# Supplementary material for: The Potential of Triterpenoids from Loquat Leaves (Eriobotrya japonica) for Prevention and Treatment of Skin Disorder
Source: MDPI journal article supplement (doi:10.3390/ijms18051030), 2017-05-11
Supplement: s1 [file s1]

# The potential of triterpenoids from loquat leaves (*Eriobotrya japonica*) for prevention and treatment of skin disorder

Hui Tan <sup>1</sup>, Tamrakar Sonam <sup>1</sup> and Kuniyoshi Shimizu <sup>1,\*</sup>

<sup>1</sup> Department of Agro-environmental Sciences, Faculty of Agriculture, Kyushu University, 6-10-1 Hakozaiki, Higashi-ku, Fukuoka, 812-8581, Japan; thth229@gmail.com (H.T.); tamrakar.snm@gmail.com (T.S.)

\* Correspondence: shimizu@agr.kyushu-u.ac.jp; Tel.: +81 092 642 3002

## Content:

|                                                                                                                                |     |
|--------------------------------------------------------------------------------------------------------------------------------|-----|
| <b>Supplementary Figure S1.</b> Anti-melanogenesis effect of methanol extract of <i>E. japonica</i> leaves.....                | I   |
| <b>Supplementary Table S1.</b> The cell viability of triterpenoids on B16 melanoma cell in each individual concentrations..... | II  |
| <b>Supplementary Table S2.</b> Anti-melanogenesis effect of triterpenoids in each individual concentrations.....               | III |
| <b>Supplementary Table S3.</b> Anti-allergy and anti-inflammatory effect of triterpenoids at 25 µg/ml.....                     | IV  |

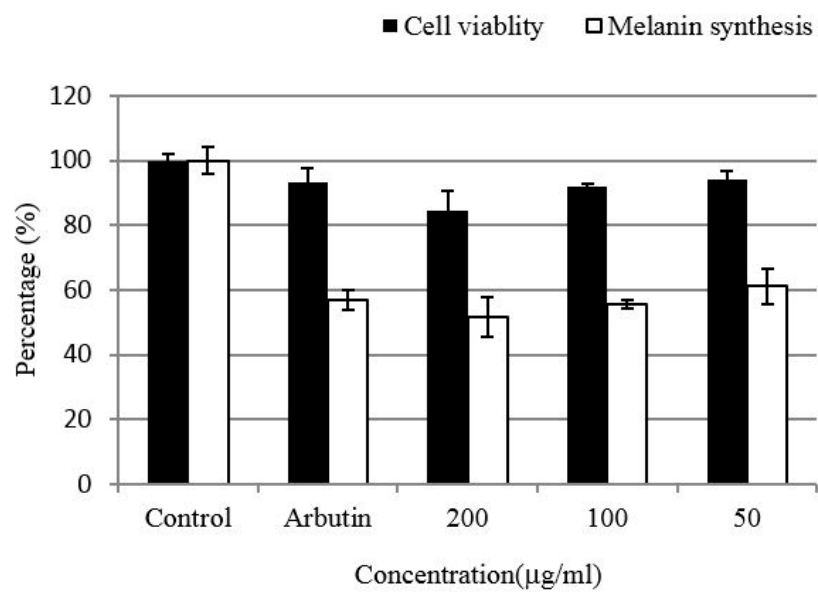

**Figure S1.** Anti-melanogenesis effect of methanol extract of *E. japonica* leaves. Arbutin (100 µg/ml) was used as a positive control.

**Table S1.** The cell viability of triterpenoids on B16 melanoma cell in each individual concentrations.

| Compound <sup>d</sup> | CC <sub>50</sub> <sup>a</sup> cell viability |         | 20 µg/ml                         | 10 µg/ml      | 5 µg/ml      | 2.5 µg/ml    | 1 µg/ml      |
|-----------------------|----------------------------------------------|---------|----------------------------------|---------------|--------------|--------------|--------------|
|                       | (µM)                                         | (µg/ml) | Inhibition rate <sup>b</sup> (%) |               |              |              |              |
| 1                     | 9.4                                          | 4.3     | n.d. <sup>c</sup>                | n.d.          | 54.8 ± 7.0** | 31.2 ± 11.7* | 0.0 ± 4.4    |
| 2                     | 39.9                                         | 18.2    | 54.9 ± 2.3**                     | 27.4 ± 7.0**  | 17.0 ± 6.2*  | 7.8 ± 4.1*   | 4.9 ± 4.6    |
| 3                     | > 45.2                                       | >20.0   | 6.5 ± 7.4                        | 10.8 ± 6.8    | 4.0 ± 7.6    | n.d.         | n.d.         |
| 4                     | 16.7                                         | 7.6     | 68.1 ± 11.4**                    | 58.4 ± 14.1** | 35.9 ± 5.2** | 20.8 ± 5.2** | 1.2 ± 12.0   |
| 5                     | 17.5                                         | 8.4     | n.d.                             | 75.9 ± 0.5**  | 12.1 ± 8.6   | 1.3 ± 5.2    | 4.7 ± 8.1    |
| 6                     | 18.7                                         | 9.1     | n.d.                             | 59.4 ± 7.0**  | 15.4 ± 5.1** | 10.5 ± 10.9* | 4.5 ± 13.7   |
| 7                     | 29.3                                         | 13.8    | 76.5 ± 3.0**                     | 44.3 ± 6.4**  | 42.2 ± 4.0** | 3.2 ± 4.8    | 2.5 ± 2.2    |
| 8                     | 25.8                                         | 12.2    | 94.8 ± 0.3**                     | 39.3 ± 4.7**  | 0.3 ± 4.0    | 0.0 ± 3.8    | 0.0 ± 3.5    |
| 9                     | > 42.3                                       | >20.0   | 14.8 ± 4.1*                      | 3.4 ± 4.1     | 0.0 ± 11.8   | 0.0 ± 10.3   | n.d.         |
| 10                    | 10.5                                         | 4.9     | n.d.                             | 68.4 ± 1.5**  | 50.9 ± 4.4** | 0.0 ± 6.1    | 1.9 ± 5.4    |
| 11                    | 23.3                                         | 11.4    | 85.8 ± 1.6**                     | 52.4 ± 8.6*   | 8.7 ± 12.1   | 13.7 ± 10.7  | 12.0 ± 12.8  |
| 12                    | 25.6                                         | 12.5    | 91.1 ± 1.0**                     | 44.9 ± 2.7**  | 0.0 ± 6.6    | 0.0 ± 6.9    | n.d.         |
| 13                    | 8.9                                          | 4.0     | n.d.                             | 80.3 ± 3.0**  | 51.5 ± 3.7** | 42.7 ± 2.1** | 39.1 ± 2.6** |
| 14                    | 10.9                                         | 5.3     | n.d.                             | 69.1 ± 10.0** | 44.1 ± 0.4** | 1.2 ± 9.7    | 2.5 ± 8.3    |
| 15                    | > 42.3                                       | >20.0   | 26.4 ± 1.4**                     | 11.4 ± 3.9*   | 5.6 ± 4.6    | n.d.         | n.d.         |
| 16                    | 16.5                                         | 7.8     | n.d.                             | 60.3 ± 6.5**  | 28.9 ± 3.2** | 14.7 ± 4.2*  | 3.7 ± 3.8    |
| 17                    | 24.0                                         | 15.6    | 61.0 ± 1.6**                     | 41.1 ± 9.2**  | 10.7 ± 10.0  | 5.1 ± 6.0    | 0.0 ± 8.4    |
| 18                    | 19.5                                         | 12.6    | 80.1 ± 9.5**                     | 42.4 ± 14.9*  | 12.6 ± 8.4   | 6.6 ± 11.1   | 7.0 ± 8.8    |

<sup>a</sup>. CC<sub>50</sub> value is defined as the concentration at 50% inhibition on cell viability, calculated from corresponding dose response curves;

<sup>b</sup>. Inhibition rate (%) = 100% – cell viability (%) of each tested compound;

<sup>c</sup>. n.d.: not determined;

<sup>d</sup>. Arbutin was used as positive control and showed CC<sub>50</sub> value of 1820.2 µM.

**Table S2.** Anti-melanogenesis effect of triterpenoids in each individual concentrations.

| Compound <sup>d</sup> | IC <sub>50</sub> <sup>a</sup> melanin |         | 20 µg/ml                         | 10 µg/ml     | 5 µg/ml      | 2.5 µg/ml    | 1 µg/ml      | 0.5 µg/ml    |
|-----------------------|---------------------------------------|---------|----------------------------------|--------------|--------------|--------------|--------------|--------------|
|                       | (µM)                                  | (µg/ml) | Inhibition rate <sup>b</sup> (%) |              |              |              |              |              |
| 1                     | 4.8                                   | 2.2     | n.d. <sup>c</sup>                | n.d.         | n.d.         | 58.5 ± 3.2** | 24.0 ± 0.8** | 4.2 ± 1.7    |
| 2                     | 26.8                                  | 12.2    | 58.6 ± 2.3**                     | 45.9 ± 1.5** | 33.5 ± 6.0** | 27.8 ± 4.8** | 9.5 ± 4.6    | n.d.         |
| 3                     | > 45.2                                | >20.0   | 14.6 ± 4.6**                     | 14.2 ± 2.6** | 0.0 ± 6.9    | n.d.         | n.d.         | n.d.         |
| 4                     | 11.8                                  | 5.3     | n.d.                             | 54.0 ± 3.3** | 49.7 ± 3.1** | 44.8 ± 1.4** | 35.4 ± 0.5** | 23.2 ± 1.4** |
| 5                     | 12.8                                  | 6.2     | n.d.                             | 68.2 ± 0.6** | 44.8 ± 4.3** | 1.6 ± 0.6    | 0.0 ± 4.4    | n.d.         |
| 6                     | 16.1                                  | 7.8     | n.d.                             | 63.5 ± 2.7** | 32.7 ± 1.5** | 2.8 ± 4.5    | 0.0 ± 1.9    | n.d.         |
| 7                     | 18.5                                  | 8.7     | 65.1 ± 0.4**                     | 54.5 ± 3.0** | 47.5 ± 0.4** | 12.2 ± 1.9   | 2.8 ± 1.1    | n.d.         |
| 8                     | 18.7                                  | 8.8     | n.d.                             | 59.8 ± 1.9** | 17.4 ± 5.5*  | 0.5 ± 4.1    | 3.4 ± 5.1    | n.d.         |
| 9                     | > 42.3                                | >20.0   | 7.8 ± 0.9                        | n.d.         | 0.0 ± 5.3    | 1.0 ± 5.4    | n.d.         | n.d.         |
| 10                    | 14.0                                  | 6.6     | n.d.                             | 55.8 ± 8.1** | 43.9 ± 1.9** | 28.4 ± 1.5** | 3.2 ± 8.2    | n.d.         |
| 11                    | 18.5                                  | 9.0     | 73.4 ± 8.0**                     | 51.3 ± 0.9** | 34.8 ± 4.5** | 11.3 ± 3.4   | 0.0 ± 6.1    | n.d.         |
| 12                    | 34.0                                  | 16.6    | 58.8 ± 0.0**                     | 35.0 ± 3.6** | 0.0 ± 3.6    | 0.0 ± 7.2    | n.d.         | n.d.         |
| 13                    | 18.0                                  | 8.1     | n.d.                             | 52.9 ± 0.6** | 45.5 ± 2.7** | 39.7 ± 0.6** | 41.0 ± 2.1   | 37.4 ± 1.1** |
| 14                    | 14.8                                  | 7.2     | n.d.                             | 67.3 ± 1.4** | 39.5 ± 3.1** | 15.8 ± 1.8*  | 6.9 ± 1.8    | n.d.         |
| 15                    | > 42.3                                | >20.0   | n.d.                             | 24.2 ± 1.0** | n.d.         | n.d.         | n.d.         | n.d.         |
| 16                    | 21.6                                  | 10.1    | n.d.                             | 51.8 ± 5.0** | 13.4 ± 5.5** | 1.9 ± 3.4    | 0.1 ± 4.5    | n.d.         |
| 17                    | > 30.9                                | >20.0   | 30.5 ± 6.0**                     | 29.4 ± 6.8** | 11.1 ± 0.6*  | 6.2 ± 1.7    | 2.8 ± 0.9    | n.d.         |
| 18                    | > 30.9                                | >20.0   | 47.1 ± 6.0**                     | 35.6 ± 1.1** | 0.0 ± 3.8    | 0.0 ± 5.3    | 0.0 ± 2.1    | n.d.         |

<sup>a</sup>. IC<sub>50</sub> value is defined as the concentration at 50% inhibition on melanin synthesis, calculated from corresponding dose response curves;

<sup>b</sup>. Inhibition rate (%) = 100% – melanin synthesis (%) of each tested compound;

<sup>c</sup>. n.d.: not determined;

<sup>d</sup>. Arbutin was used as positive control and showed the IC<sub>50</sub> value of 976.5 µM.

**Table S3.** Anti-allergy and anti-inflammatory effect of triterpenoids at 25 µg/ml.

| No.                  | Cell viability (%) | Inhibition rate (%) | No.       | Cell viability (%) | Inhibition rate (%) |
|----------------------|--------------------|---------------------|-----------|--------------------|---------------------|
| <b>1<sup>a</sup></b> | 103.1 ± 5.3        | 72.5 ± 3.0**        | <b>10</b> | 77.0 ± 5.3**       | 22.4 ± 1.9          |
| <b>2</b>             | 102.0 ± 6.2        | 5.8 ± 6.7           | <b>11</b> | 62.6 ± 1.1**       | n.d.                |
| <b>3</b>             | 110.2 ± 10.2       | 29.9 ± 3.3          | <b>12</b> | 93.9 ± 7.3         | 74.5 ± 1.3**        |
| <b>4</b>             | 97.9 ± 10.6        | 29.4 ± 8.1          | <b>13</b> | 85.6 ± 4.2*        | n.d.                |
| <b>5</b>             | 105.8 ± 1.1        | 8.5 ± 9.5           | <b>14</b> | 66.8 ± 11.1**      | n.d.                |
| <b>6</b>             | 97.6 ± 14.1        | 2.4 ± 14.1          | <b>15</b> | 102.1 ± 2.2        | 0.9 ± 0.0           |
| <b>7</b>             | 84.4 ± 0.5*        | 66.0 ± 2.6*         | <b>16</b> | 99.9 ± 2.3         | n.d.                |
| <b>8</b>             | 80.4 ± 1.6**       | 36.1 ± 6.7          | <b>17</b> | 99.8 ± 7.0         | n.d.                |
| <b>9</b>             | 98.0 ± 7.7         | 54.4 ± 4.9*         | <b>18</b> | 104.6 ± 6.7        | n.d.                |
